# Supplementary material for: Genetic evaluation of the patients with clinically diagnosed inborn errors of immunity by whole exome sequencing: Results from a specialized research center for immunodeficiency in Türkiye
Source: Research Square preprint supplement (doi:10.21203/rs.3.rs-4058291/v1), 2024-03-11
Supplement: Supplementary file 1 [file 046693bc4a921af98dc963eb.pdf]

**Genetic evaluation of the patients with clinically diagnosed inborn errors of immunity by whole exome sequencing: Results from a specialized research center for immunodeficiency in Türkiye**

**Journal of Clinical Immunology**

Baran Erman<sup>1,2</sup>, Umran Aba<sup>2,3</sup>, Canberk Ipsir<sup>2,3</sup>, Damla Pehlivan<sup>2</sup>, Caner Aytekin<sup>4</sup>, Gökhan Cildir<sup>5</sup>, Begum Cicek<sup>1</sup>, Ceren Bozkurt<sup>2</sup>, Sidem Tekeoğlu<sup>2</sup>, Melisa Kaya<sup>2</sup>, Cigdem Aydoğmus<sup>6</sup>, Funda Cipe<sup>7</sup>, Gülsan Sucak<sup>8</sup>, Sevgi Bilgic Eltan<sup>9</sup>, Ahmet Özen<sup>9</sup>, Safa Barış<sup>9</sup>, Elif Karakoç-Aydiner<sup>9</sup>, Ayca Kıyıkım<sup>10</sup>, Betül Karaatmaca<sup>11</sup>, Hulya Kose<sup>12</sup>, Dilara Fatma Kocacık Uygun<sup>13</sup>, Fatih Çelmeli<sup>14</sup>, Tuğba Arıkoğlu<sup>15</sup>, Dilek Özcan<sup>16</sup>, Özlem Keskin<sup>17</sup>, Elif Arık<sup>17</sup>, Elif Soyak Aytekin<sup>18</sup>, Mahmut Cesur<sup>17</sup>, Ercan Küçükosmanoğlu<sup>17</sup>, Mehmet Kılıç<sup>19</sup>, Mutlu Yüksek<sup>20</sup>, Zafer Bıçakçı<sup>21</sup>, Saliha Esenboğa<sup>22</sup>, Deniz Çağdaş Ayvaz<sup>22,23</sup>, Asena Pınar Sefer<sup>24</sup>, Sükrü Nail Güner<sup>25</sup>, Sevgi Keleş<sup>25</sup>, İsmail Reisli<sup>25</sup>, Uğur Muşabak<sup>26</sup>, Nazlı Deveci Demirbas<sup>27</sup>, Şule Haskoloğlu<sup>27</sup>, Sara Sebnem Kılıç<sup>28,29</sup>, Ayşe Metin<sup>11</sup>, Figen Doğu<sup>27</sup>, Aydan İkinciogulları<sup>27\*</sup>, İlhan Tezcan<sup>30\*</sup>

<sup>1</sup> Institute of Child Health, Hacettepe University, Ankara, Türkiye

<sup>2</sup> Can Sucak Research Laboratory for Translational Immunology, Hacettepe University, Ankara, Türkiye

<sup>3</sup> Department of Pediatric Immunology, Institute of Child Health, Hacettepe University, Ankara, Türkiye

<sup>4</sup> Pediatric Immunology, SBU Ankara Dr Sami Ulus Maternity Child Health and Diseases Training and Research Hospital, Ankara, Türkiye

<sup>5</sup> Centre for Cancer Biology, SA Pathology and the University of South Australia, Adelaide, SA 5000, Australia

<sup>6</sup> Department of Pediatric Allergy and Clinical Immunology, University of Health Sciences, Istanbul Basaksehir Cam and Sakura City Hospital, Istanbul, Türkiye

<sup>7</sup> Department of Pediatric Allergy and Clinical Immunology, Altinbas University School of Medicine, Istanbul, Türkiye

<sup>8</sup> Medical Park Bahçeşehir Hospital, Clinic of Hematology and Transplantation, İstanbul, Türkiye

<sup>9</sup> Marmara University, Faculty of Medicine, Department of Pediatric Allergy and Immunology, Jeffrey Modell Diagnostic and Research Center for Primary Immunodeficiencies, The Isil Berat Barlan Center for Translational Medicine, Istanbul, Türkiye

<sup>10</sup> Pediatric Allergy and Immunology, Cerrahpasa School of Medicine, Istanbul University-Cerrahpasa, Istanbul, Türkiye

<sup>11</sup> Department of Pediatric Allergy and Immunology, University of Health Sciences, Ankara Bilkent City Hospital, Ankara, Türkiye

<sup>12</sup> Department of Pediatric Immunology, Diyarbakir Children Hospital, Diyarbakır, Türkiye

<sup>13</sup> Division of Allergy Immunology, Department of Pediatrics, Akdeniz University Faculty of Medicine, Antalya, Türkiye

<sup>14</sup> Republic of Türkiye Ministry of Health Antalya Training and Research Hospital Pediatric Immunology and Allergy Diseases, Antalya, Türkiye

<sup>15</sup> Department of Pediatric Allergy and Immunology, Faculty of Medicine, Mersin University, Mersin, Türkiye

<sup>16</sup> Division of Pediatric Allergy and Immunology, Faculty of Medicine, Balcali Hospital, Cukurova University, Adana, Türkiye

<sup>17</sup> Department of Pediatric Allergy and Immunology, Faculty of Medicine, Gaziantep University, Gaziantep, Türkiye

<sup>18</sup> Department of Pediatric Allergy and Immunology, Etlik City Hospital, Ankara, Türkiye

<sup>19</sup> Division of Allergy and Immunology, Department of Pediatrics, Faculty of Medicine, University of Firat, Elazığ, Türkiye

<sup>20</sup> Department of Pediatric Immunology and Allergy, Faculty of Medicine, Zonguldak Bulent Ecevit University, Zonguldak, Türkiye

<sup>21</sup> Department of Pediatric Hematology, Faculty of Medicine, Ataturk University, Türkiye

<sup>22</sup> Hacettepe University School of Medicine, Department of Pediatrics, Division of Pediatric Immunology, Ankara, Türkiye

<sup>23</sup> Section of Pediatric Immunology, Institute of Child Health, Hacettepe University, Ankara, Türkiye

<sup>24</sup> Department of Pediatric Allergy and Immunology, Şanlıurfa Training and Research Hospital, Şanlıurfa, Türkiye

<sup>25</sup> Department of Pediatric Immunology and Allergy, Medicine Faculty, Necmettin Erbakan University, Konya, Türkiye

<sup>26</sup> Department of Immunology and Allergy, Baskent University School of Medicine, Ankara, Ankara, Türkiye

<sup>27</sup> Department of Pediatric Immunology and Allergy, Ankara University Faculty of Medicine, Ankara, Türkiye

<sup>28</sup> Division of Pediatric Immunology-Rheumatology, Bursa Uludag University Faculty of Medicine, Bursa, Türkiye

<sup>29</sup> Translational Medicine, Bursa Uludag University, Translational Medicine, Bursa, Türkiye

<sup>30</sup> Hacettepe University School of Medicine, Department of Pediatrics, Division of Pediatric Immunology, Ankara, Türkiye

\*These authors contributed equally to this work

**Correspondence:** Baran Erman, [baranerman@gmail.com](mailto:baranerman@gmail.com)

**Keywords:** Inborn errors of immunity, next generation sequencing, whole exome sequencing, genetic diagnosis

**Supplementary Table 1:** Detailed evaluation of possible disease-causing monoallelic variants

| Patient no | Gene          | Variant                         | CADD | ACMG criteria                    | Associated features                                                                                          | Novelty      | Reporting status | Functional demonstration                                                        |
|------------|---------------|---------------------------------|------|----------------------------------|--------------------------------------------------------------------------------------------------------------|--------------|------------------|---------------------------------------------------------------------------------|
| P19        | <i>SAMD9L</i> | c.A2639C<br>p.His880Pro         | 27.6 | VUS                              | Dandy Walker malformation, low B cells                                                                       | Novel        | -                | Aplastic anemia in bone marrow examination                                      |
| P42        | <i>CTLA4</i>  | c.118G>A<br>p.Val40Met          | 24.3 | VUS                              | AIHA, enteropathy, reduced T and B cells                                                                     | rs1553657378 | [1-4]            | -                                                                               |
| P43        | <i>JAK1</i>   | c.2485A>G<br>p.Asn829Asp        | 23.7 | VUS                              | IBD, lymphopenia, vitiligo                                                                                   | Novel        | -                | Increased phosphorylation of JAK1 and STAT1                                     |
| P53        | <i>ELANE</i>  | c.703delG<br>p.Val235TrpfsTer5  | -    | VUS                              | Recurrent bacterial infections, severe congenital neutropenia                                                | Novel        | -                | Congenital neutropenia                                                          |
| P54        | <i>HCK</i>    | c.135_136delinsTG<br>p.Pro46Ala | -    | VUS                              | Nodulocystic acnes, cutaneous vasculitis, HSM                                                                | Novel        | -                | Increased phosphorylation of STAT5, high levels of inflammatory cytokines       |
| P70        | <i>FAS</i>    | c.361C>T<br>p.Arg121Trp         | 22.1 | Pathogenic/<br>Likely Pathogenic | Splenomegaly, lymphadenopathy, ITP                                                                           | rs121913078  | [5]              | -                                                                               |
| P74        | <i>CTLA4</i>  | c.151C>T<br>p.Arg51Ter          | 34   | Pathogenic                       | Lymphadenopathy, lymphopenia, hypogammaglobulinemia, reduced switched memory B cells                         | rs606231417  | [4, 6]           | -                                                                               |
| P82        | <i>ELANE</i>  | c.367-8C>A                      | -    | VUS                              | Early onset IBD, oral aphthosis, recurrent gastrointestinal infections, severe congenital neutropenia        | novel        | -                | Reduced/absence expression of ELANE by western blot                             |
| P85        | <i>FAS</i>    | c.772A>AG<br>p.Lys258Glu        | 23.6 | VUS                              | Lymphoproliferation, elevated DNT                                                                            | novel        | -                | Aberrant lymphocyte apoptosis                                                   |
| P88        | <i>BACH2</i>  | c.745del<br>p.Ser249ValfsTer93  | -    | Likely Pathogenic                | IBD, pancreatitis, hypogammaglobulinemia                                                                     | novel        | -                | Reduced/absence expression of BACH2 by western blot                             |
| P93        | <i>CHD7</i>   | c.1904A>T<br>p.Asp635Val        | 27   | VUS                              | Facial dysmorphic features, recurrent pulmonary infections, chronic severe diarrhea, reduced CD3 lymphocytes | rs752468864  | -                | Poor proliferative T cell response, fulfilling criteria for CHARGE syndrome [7] |
| P96        | <i>TBK1</i>   | c.1055T>C<br>p.Leu352Pro        | 26.1 | VUS                              | Enteroviral meningitis, recurrent sinopulmonary infections, failure to thrive                                | novel        | -                | Impaired immune response to TLR3-dependent viruses                              |
| P101       | <i>PIK3CD</i> | c.1573G>A<br>p.Glu525Lys        | 24.8 | Pathogenic/<br>Likely Pathogenic | Lichen planus, fulminant hepatic failure, granuloma, ITP,                                                    | rs587777389  | [8, 9]           | -                                                                               |

|             |               |                          |      |                                     |                                                                                                                                                                 |             |        |                               |
|-------------|---------------|--------------------------|------|-------------------------------------|-----------------------------------------------------------------------------------------------------------------------------------------------------------------|-------------|--------|-------------------------------|
|             |               |                          |      |                                     | lymphoproliferation, reduced switched memory B cells                                                                                                            |             |        |                               |
| <b>P102</b> | <i>FAS</i>    | c.340G>A<br>p.Glu114Lys  | 26.5 | VUS                                 | Missense                                                                                                                                                        | rs773565107 | -      | Aberrant lymphocyte apoptosis |
| <b>P103</b> | <i>STAT1</i>  | c.1192G>A<br>p.Gly397Ser | 28.9 | VUS                                 | Recurrent pulmonary infections, bronchiectasis, CMC, nail dystrophia, severe growth retardation, hypothyroidism, hypergammaglobulinemia, CD4+ T cel lymphopenia | novel       | -      |                               |
| <b>P104</b> | <i>IL6ST</i>  | c.2093C>A<br>p.Ala698Glu | 23.3 | VUS                                 | Recurrent pulmonary infections, bronchiectasis, severe eczema, hypogammaglobulinemia, elevated IgE, lymphopenia                                                 | rs745818447 | -      |                               |
| <b>P122</b> | <i>PIK3CD</i> | c.1573G>A<br>p.Glu525Lys | 29.6 | Pathogenic/<br>Likely<br>Pathogenic | EBV infection, lymphadenopathy, reduced IgA and IgG                                                                                                             | rs587777389 | [8, 9] | -                             |

CADD: Combined Annotation Dependent Depletion ACMG: American College of Medical Genetics and Genomics VUS: Variant of Uncertain Significance  
 AIHA: Autoimmune hemolytic anemia HSM: Hepatosplenomegaly IBD: Inflammatory bowel disease ITP: Immune thrombocytopenic purpura DNT: Double negative T cells

## References

1. Egg D, Rump IC, Mitsuiki N, Rojas-Restrepo J, Maccari ME, Schwab C, et al. Therapeutic options for CTLA-4 insufficiency. *J Allergy Clin Immunol.* 2022;149(2):736-46.
2. Hoshino A, Tanita K, Kanda K, Imadome KI, Shikama Y, Yasumi T, et al. High frequencies of asymptomatic Epstein-Barr virus viremia in affected and unaffected individuals with CTLA4 mutations. *Clin Immunol.* 2018;195:45-8.
3. Rae W, Ward D, Mattocks C, Pengelly RJ, Eren E, Patel SV, et al. Clinical efficacy of a next-generation sequencing gene panel for primary immunodeficiency diagnostics. *Clin Genet.* 2018;93(3):647-55.
4. Schwab C, Gabrysch A, Olbrich P, Patino V, Warnatz K, Wolff D, et al. Phenotype, penetrance, and treatment of 133 cytotoxic T-lymphocyte antigen 4-insufficient subjects. *J Allergy Clin Immunol.* 2018;142(6):1932-46.
5. Bettinardi A, Brugnoli D, Quiros-Roldan E, Malagoli A, La Grutta S, Correra A, Notarangelo LD. Missense mutations in the Fas gene resulting in autoimmune lymphoproliferative syndrome: a molecular and immunological analysis. *Blood.* 1997;89(3):902-9.
6. Kuehn HS, Ouyang W, Lo B, Deenick EK, Niemela JE, Avery DT, et al. Immune dysregulation in human subjects with heterozygous germline mutations in CTLA4. *Science.* 2014;345(6204):1623-7.

7. Verloes A. Updated diagnostic criteria for CHARGE syndrome: a proposal. *Am J Med Genet A*. 2005;133A(3):306-8.
8. Coulter TI, Chandra A, Bacon CM, Babar J, Curtis J, Screatton N, et al. Clinical spectrum and features of activated phosphoinositide 3-kinase delta syndrome: A large patient cohort study. *J Allergy Clin Immunol*. 2017;139(2):597-606 e4.
9. Lucas CL, Kuehn HS, Zhao F, Niemela JE, Deenick EK, Palendira U, et al. Dominant-activating germline mutations in the gene encoding the PI(3)K catalytic subunit p110delta result in T cell senescence and human immunodeficiency. *Nat Immunol*. 2014;15(1):88-97.
